# Supplementary figures and images for: Real-world first-line treatment of patients with BRAFV600E-mutant metastatic colorectal cancer: the CAPSTAN CRC study
Source: PubMed Central journal article supplement — ESMO Open. 2022 Nov 8;7(6):100603. doi: 10.1016/j.esmoop.2022.100603 (PMC9832736; doi:10.1016/j.esmoop.2022.100603), 2022-11-08

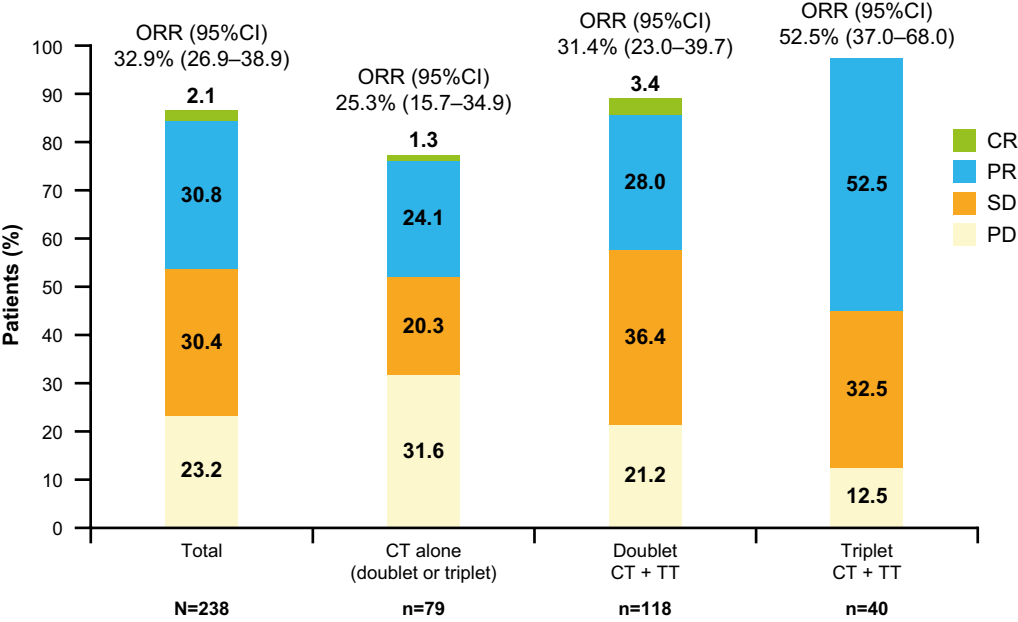

Supplement: mmc2.pdf [file mmc2.pdf]
